# Supplementary material for: Benzyne cycloaddition onto carbon nanohorns
Source: Royal Society of Chemistry journal article supplement (doi:10.1039/c3nr01755a), 2013-01-01
Supplement: c3nr01755a.pdf [file c3nr01755a.pdf]

# Electronic Supplementary Information

## Benzyne cycloaddition onto carbon nanohorns

Demetrios Chronopoulos,<sup>a</sup> Nikolaos Karousis,<sup>a</sup> Toshinari Ichihashi,<sup>b</sup> Masako Yudasaka,<sup>c</sup> Sumio Iijima<sup>c</sup> and Nikos Tagmatarchis<sup>\*a</sup>

<sup>a</sup> *Theoretical and Physical Chemistry Institute, National Hellenic Research Foundation, 48 Vassileos Constantinou Avenue, Athens 11635, Greece. Fax: (+30) 210 7273794; Tel: (+30) 210 7273835; E-mail: [tagmatar@eie.gr](mailto:tagmatar@eie.gr)*

<sup>b</sup> *NEC Corporation, 34 Miyukigaoka, Tsukuba 305-8501, Japan*

<sup>c</sup> *Nanotube Research Center, National Institute of Advanced Industrial Science and Technology (AIST), Central 5, 1-1-1 Higashi, Tsukuba 305-8565, Japan*

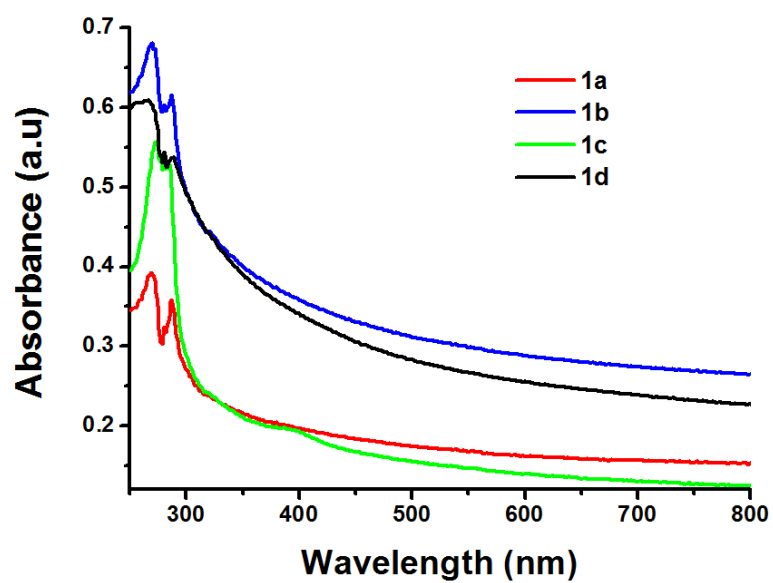

**Figure S1.** UV-Vis-NIR spectra of **1a-d**.

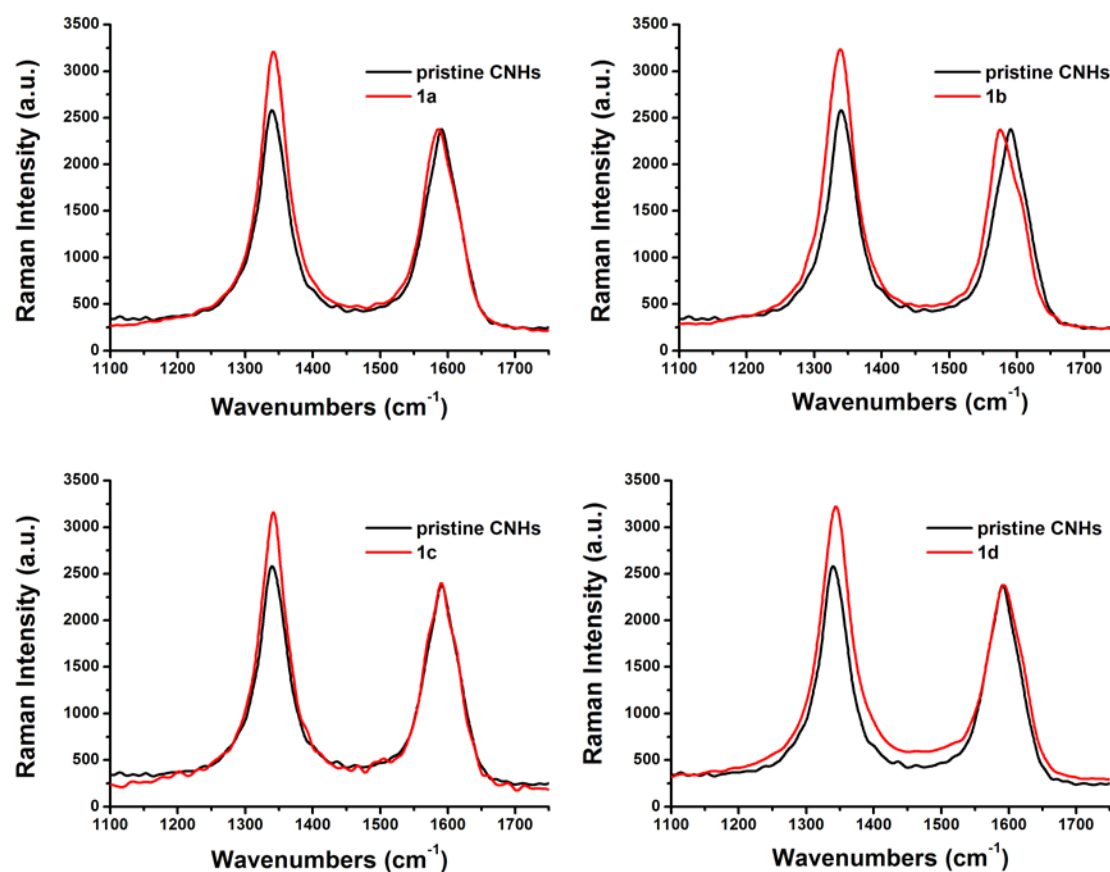

**Figure S2.** Raman spectra of **1a-d**.

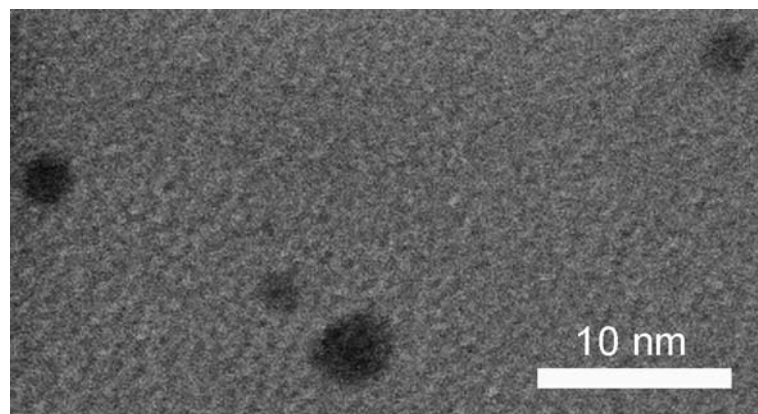

**Figure S3.** TEM image of Au nanoparticles immobilized onto thioctic acid (reference sample).

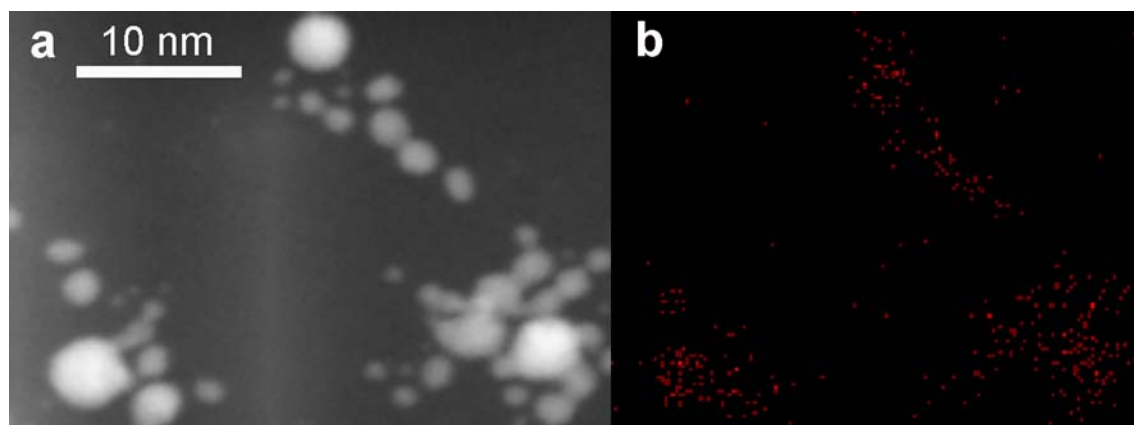

**Figure S4.** Z-contrast and EDX mapping of Au nanoparticles immobilized onto thioctic acid (reference sample).
